# Supplementary material for: Transcriptome Analysis Reveals Key Genes Involved in Weevil Resistance in the Hexaploid Sweetpotato
Source: MDPI journal article supplement (doi:10.3390/plants10081535), 2021-07-27
Supplement: s1 [file s1]

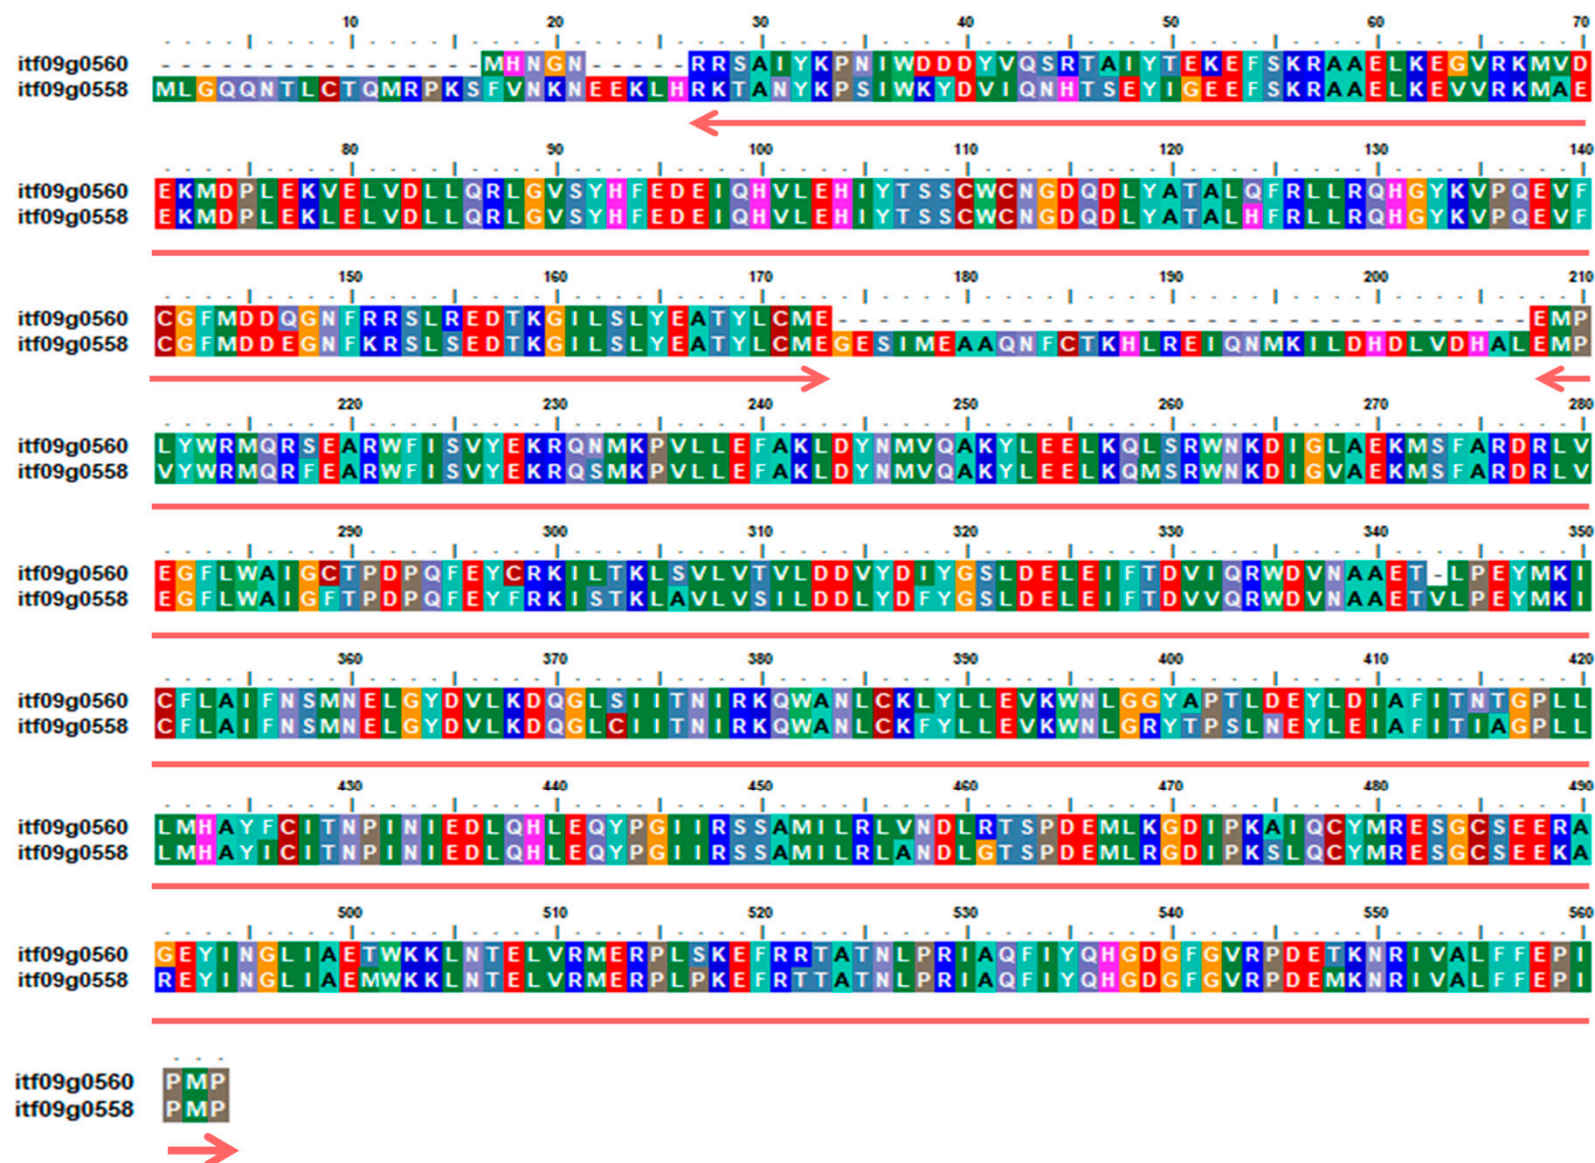

Supplemental Figure 3. The sequence homology of the amino acid sequences of the two genes (itf09g05600.t1, itf09g05580.t1). Red arrow indicates the conserved region between the two genes.
