# Supplementary material for: Transcriptome Analysis Reveals Key Genes Involved in Weevil Resistance in the Hexaploid Sweetpotato
Source: MDPI journal article supplement (doi:10.3390/plants10081535), 2021-07-27
Supplement: s1 [file s1]

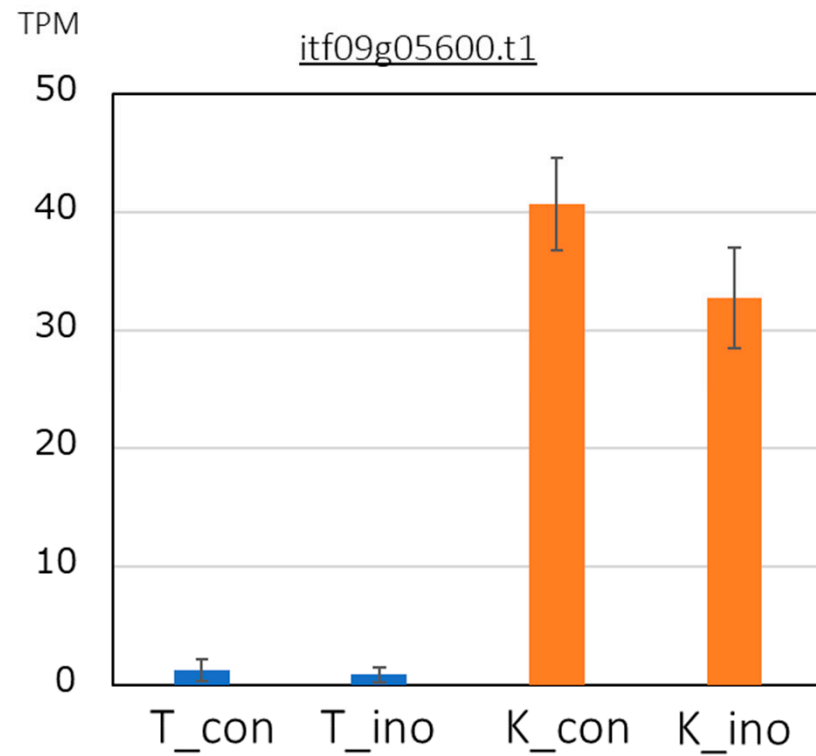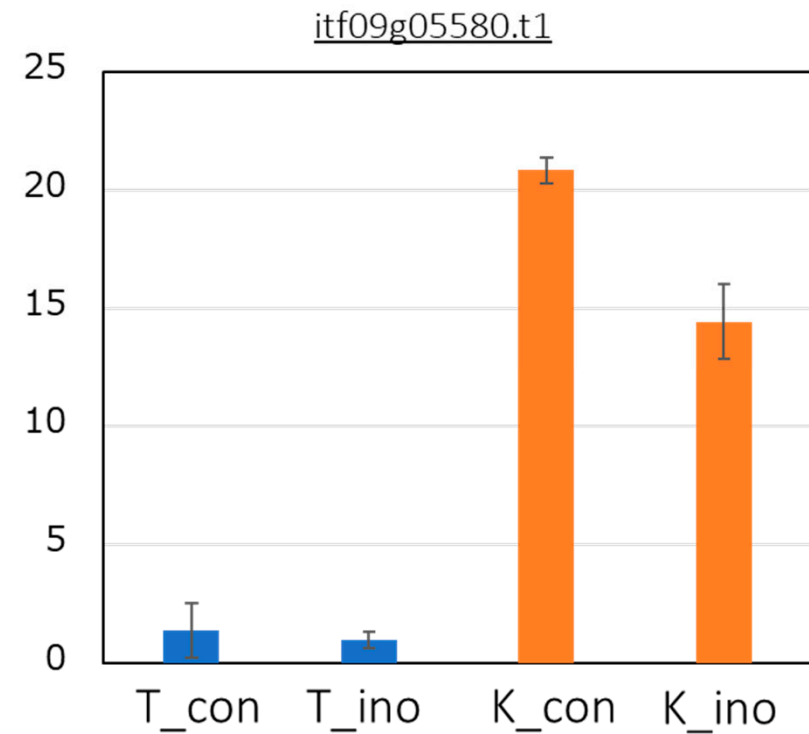

Supplemental Figure 2. Gene expression level of the candidate two genes (itf09g05600.t1, itf09g05580.t1) based on the TPM values.
