# Supplementary figures and images for: Transcriptome Analysis Reveals Key Genes Involved in Weevil Resistance in the Hexaploid Sweetpotato
Source: MDPI journal article supplement (doi:10.3390/plants10081535), 2021-07-27

itf09g05600.t1

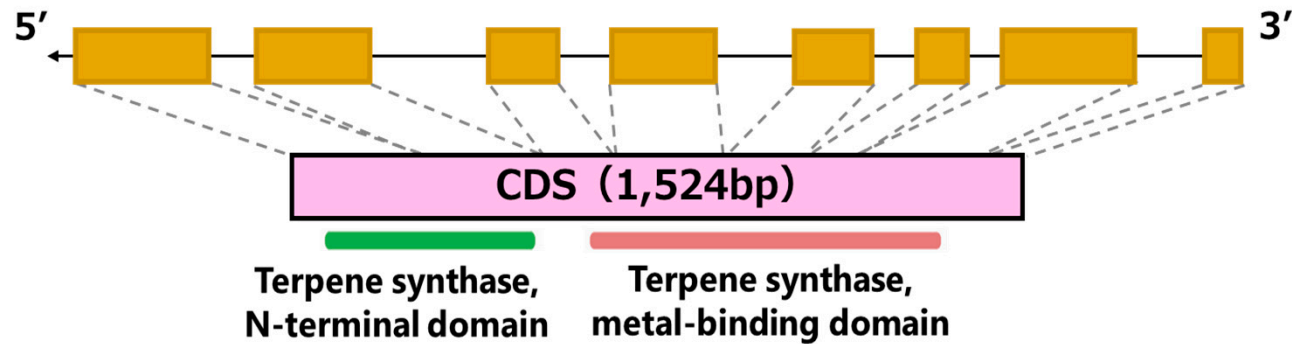

itf09g05580.t1

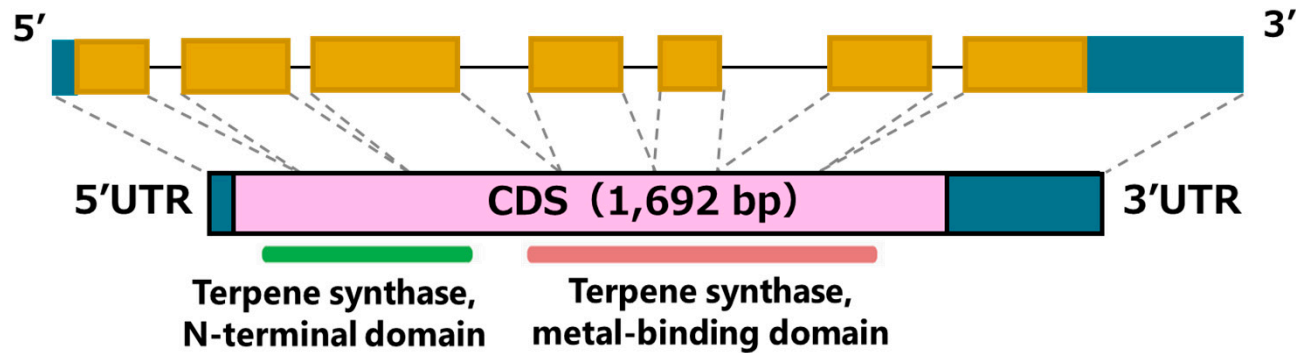

Supplemental Figure 4. Gene structure and functional domains of the two genes.

Supplement: s1 [file s1]
